# Supplementary material for: Efficacy and ototoxicity of different cyclodextrins in Niemann–Pick C disease
Source: PubMed Central journal article supplement — Ann Clin Transl Neurol. 2016 Apr 20;3(5):366–80. doi: 10.1002/acn3.306 (PMC4863749; doi:10.1002/acn3.306), 2016-04-20
Supplement: ACN3-3-366-s002.pdf [file ACN3-3-366-s002.pdf]

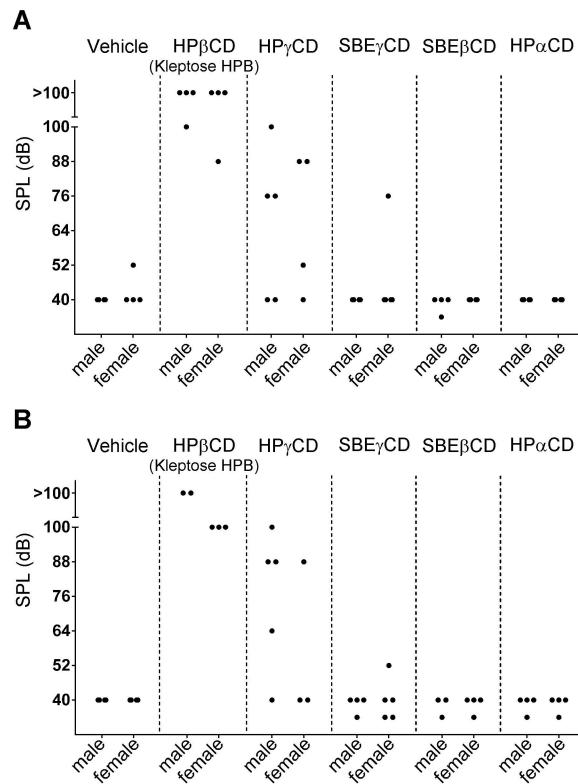

**Supplementary Figure 2.** Ototoxicity of different CDs as assessed by ABR recordings. (A) ABR thresholds evaluated in 8-week-old mice, 18-24 hours post-injection. (B) ABR thresholds evaluated in 28-week-old mice, after 20 CD injections given once weekly. Differences between treatment groups are similar to those observed after 4 weeks of CD injections (see Fig 5), suggesting that adverse effects on hearing are not progressive and that sustained treatment with the SBE-CDs or HPαCD does not lead to ototoxicity.
